# Supplementary material
Source: PubMed Central journal article supplement (PMC7609993)
Supplement: mmc1.pdf [file mmc1.pdf]

**IgA Vasculitis with Nephritis (Henoch-Schönlein purpura) in a COVID-19 patient**

**Supplementary references**

- S1 Uppal SS, Hussain MA, Al-Raqum HA, et al. Henoch-Schönlein's purpura in adults versus children/adolescents: A comparative study. *Clin Exp Rheumatol*. 2006;24(2 Suppl 41): S26-S30.
- S2 Saulsbury FT. Clinical update: Henoch-Schönlein purpura. *Lancet*. 2007;369(9566):976-978.
- S3 Shi D, Chan H, Yang X, et al. Risk factors associated with IgA vasculitis with nephritis (Henoch-Schönlein purpura nephritis) progressing to unfavorable outcomes: A meta-analysis. *PLoS One*. 2019;14(10):e0223218.
- S4 Farkash EA, Wilson AM, Jentzen JM. Ultrastructural Evidence for Direct Renal Infection with SARS-CoV-2. *J Am Soc Nephrol*. 2020; ASN.2020040432.
- S5 Puelles VG, Lütgehetmann M, Lindenmeyer MT, et al. Multiorgan and Renal Tropism of SARS-CoV-2. *N Engl J Med*. 2020; NEJMc2011400.
- S6 Varga Z, Flammer AJ, Steiger P, et al. Endothelial cell infection and endothelitis in COVID-19. *Lancet*. 2020;395(10234):1417-1418.
